# Diversification or collapse of self-incompatibility haplotypes as outcomes of evolutionary rescue

Alexander Harkness<sup>1\*</sup>, Emma E. Goldberg<sup>1</sup>, Yaniv Brandvain<sup>2</sup>

<sup>1</sup>Department of Ecology, Evolution, and Behavior, University of Minnesota

<sup>2</sup>Department of Plant and Microbial Biology, University of Minnesota

\*Corresponding author: 1497 Gortner Avenue, 140 Gortner Lab, St. Paul, MN 55108

harkn042@umn.edu

## Abstract

2 Self-incompatibility systems in angiosperms are exemplars of extreme allelic poly-  
morphism maintained by long-term balancing selection. Pollen that shares an allele  
4 with the pollen recipient at the self-incompatibility locus is rejected, and this rejec-  
tion favors rare alleles as well as preventing self-fertilization. Advances in molecular  
6 genetics reveal that an ancient, deeply conserved, and well-studied incompatibility  
system functions through multiple tightly linked genes encoding separate pollen-  
8 expressed F-box proteins and pistil-expressed ribonucleases. We show that certain  
recombinant haplotypes at the incompatibility locus can drive collapse in the number  
10 of incompatibility types. We use a modified evolutionary rescue model to calculate  
the relative probabilities of increase and collapse in number of incompatibility types  
12 given the initial collection of incompatibility haplotypes and the population rate of  
gene conversion. We find that expansion in haplotype number is possible when pop-  
14 ulation size or the rate of gene conversion is large, but large contractions are likely  
otherwise. By iterating a Markov chain model derived from these expansion and col-  
16 lapse probabilities, we find that a stable haplotype number distribution in the realistic  
range of 10–40 is possible under plausible parameters. However, small or moderate-  
18 sized populations should be susceptible to substantial additional loss of haplotypes

beyond those lost by chance during bottlenecks. The same processes that can gener-  
20 ate many incompatibility haplotypes in large populations may therefore be crushing  
haplotype diversity in smaller populations.

## 22 Introduction

Self-incompatibility (SI) is a common strategy by which plants ensure outcrossing, and it provides  
24 a classic example of extreme allelic polymorphism maintained by long-term balancing selection.  
An SI plant rejects self pollen, which is identified by a specificity phenotype encoded by a highly  
26 polymorphic self-incompatibility locus (S-locus). This type of inbreeding avoidance mechanism  
is widespread in plants: distinct non-homologous SI systems have been discovered in the Poaceae  
28 (Li et al. 1997), Papaveraceae (Foote et al. 1994), Solanaceae (McClure et al. 1989), Brassicaceae  
(Stein et al. 1991), and Asteraceae (Hiscock et al. 2003), and some form of SI is thought to be  
30 present in nearly 40% of plant species across 100 families (Igić et al. 2008). Rejection occurs  
when the pollen specificity matches the pistil specificity, which is likewise encoded by the S-  
32 locus. Pollen with a rare specificity has an advantage because it is less likely to encounter a  
pistil with a matching specificity and is thus less likely to be rejected. This advantage of rarity  
34 results in balancing selection, which maintains polymorphism at the S-locus by protecting S-locus  
alleles (S-alleles) from loss through drift (Wright 1939). While it is “fairly obvious that selection  
36 would tend to increase the frequency of any additional alleles that may appear” (Wright 1939),  
it is not obvious how novel S-alleles do appear. Molecular genetic understanding of SI has  
38 advanced rapidly, and modern theory to explain the diversification of S-alleles must account for  
what is now known about the structure of the S-locus. We develop a population genetic model  
40 of the expansion, collapse, and long-term evolution of S-allele number under the widespread  
solanaceous SI system.

42 The SI system originally discovered in *Nicotiana* (East and Mangelsdorf 1925) is particularly  
well-studied. Counts of 10–28 alleles have been directly observed in several other species in  
44 Solanaceae, and *Physalis crassifolia* has been estimated to harbor as many as 44 (Lawrence 2000).  
In the solanaceous SI system, each haploid pollen grain carries one allele at the S-locus, and the  
46 pollen is rejected if its allele matches either of those carried by the diploid pollen recipient (East  
and Mangelsdorf 1925). Similar systems in the Plantaginaceae and the distantly related Rosaceae  
48 have been found to be homologous, which implies that the solanaceous system was present in the  
common ancestor of the asterids and rosids (Igić and Kohn 2001; Steinbachs and Holsinger 2002),

50 estimated to have lived about 120 Mya (Tank et al. 2015). S-alleles appear to be very long-lived,  
consistent with long-term balancing selection. A given allele is often more closely related to an  
52 allele in another species or even another genus than it is to other alleles in the same population,  
which is consistent with the alleles having persisted since the common ancestor of those genera  
54 (Igić and Kohn 2001). Theory for the origin and fate of S-alleles can help us understand the forces  
shaping allelic diversity within and across species.

### 56 *Conceptual challenges*

A series of influential models investigated how a system of many incompatibility alleles could  
58 arise, but only very recently have theorists incorporated assumptions fully consistent with the  
contemporary understanding of the molecular genetics of self-incompatibility. Initially, the an-  
60 swer seemed simple. Wright (1939) showed that each fully functional S-allele is under negative  
frequency-dependent selection because pollen carrying rare alleles is compatible with a larger  
62 fraction of the population. This classic model predicts the number of S-alleles maintained in a  
population as a balance between their gain by mutation or immigration and their loss by drift.  
64 Charlesworth and Charlesworth (1979) showed that functional S-alleles can invade an initially SI  
population when inbreeding depression is high and that, conversely, S-locus mutations abolish-  
66 ing SI can invade when inbreeding depression is low. This model provided a plausible hypothesis  
for the origin of SI. However, these one-gene models of incompatibility were inconsistent with  
68 the separate pistil- (McClure et al. 1989) and pollen-expressed (Lai et al. 2002; Entani et al. 2003;  
Sijacic et al. 2004) products that were later discovered. Uyenoyama et al. (2001) and Gervais  
70 et al. (2011) showed that if each specificity is instead controlled by two tightly linked pollen-  
and pistil-function loci, new S-alleles can be generated through a self-compatible intermediate,  
72 but one or more S-alleles are also lost for many parameter combinations. Sakai (2016) addition-  
ally considered that new alleles arise from old alleles and showed that if each pollen-function  
74 mutation is more likely to be rejected by the pistil-function allele that was on its initial genetic  
background, then the number of S-alleles can increase from zero into the range observed in na-  
76 ture. A critical common element among all these models is the assumption that SI functions  
through self-recognition. In self-recognition systems, pollen is accepted by default, but the pistil  
78 recognizes and rejects self pollen based on a match between complementary pistil- and pollen-  
products.

80 However, the solanaceous SI system is now known to function not through self-recognition,

but rather through a form of nonself-recognition (Kubo et al. 2010). In nonself-recognition systems, pollen is rejected by default, but complementary pollen- and pistil-products react to prevent rejection of cross pollen. Results from models of self-recognition systems may not be directly applicable to nonself-recognition. Despite the ubiquity of solanaceous SI, few models of S-allele evolution explicitly incorporate its nonself-recognition system. Fujii et al. (2016) proposed that a pollen-function mutation complementary to a novel pistil-function mutation could arise on a single background and then spread to other backgrounds through gene conversion. Bod'ová et al. (2018) enumerated several possible evolutionary pathways to new S-alleles, and their results also showed that the pathway hypothesized by Fujii et al. (2016) could either expand or reduce S-allele number. An explanation of the long-term trajectory of S-allele number must therefore account not only for the steps needed to create new fully-functioning alleles, but also for dynamics that can lead to their loss.

A stochastic process involving the risk of collapse raises radically different questions than one of continual growth. Are S-allele numbers repeatedly expanding and contracting, or do they reach equilibria where changes are rare? We may sometimes observe changes in progress if they are frequent, but infrequent changes may be buried in the past. When a contraction occurs, is it usually small or catastrophic? Large contractions, followed by re-expansion, should result in more turnover in alleles and fewer shared alleles among species than would small contractions. Since contraction is possible whether SI is maintained throughout (Bod'ová et al. 2018) or is temporarily lost in self-compatible intermediates (Uyenoyama et al. 2001; Gervais et al. 2011; Bod'ová et al. 2018), neither pathway is unidirectional. Is the pathway maintaining SI still sufficient for expansion, or are self-compatible intermediates necessary? If new proto-S-alleles are segregating in natural populations, are they self-compatible, -incompatible, or both? Answers to these questions will aid interpretation of S-allele genealogies, which document both similarities and differences between species in their complement of S-alleles. For example, the large historical contraction in S-allele number in the common ancestor of *Physalis* and *Witheringia* has been interpreted as a demographic bottleneck (Paape et al. 2008), but a firmer theoretical investigation could assess whether a collapse restricted to the S-locus is a plausible alternative explanation.

We use an evolutionary rescue model to approximate the relative probabilities of collapse and expansion in S-allele number as well as the distribution of collapse magnitudes. We find a negative relationship between initial S-allele number and the probability of further expansion. By

constructing and iterating a Markov chain out of these contraction and expansion probabilities,  
114 we find stable long-term distributions of haplotype number. Realistic S-allele numbers (20–40)  
are possible through this process alone for large but plausible values of population size and rate  
116 of gene conversion. However, contractions can be very large when they occur, often eliminating  
the majority of S-alleles. These results suggest that contractions in S-allele number are ubiquitous  
118 unless new S-alleles are prevented from invading in the first place, as might occur if they cause  
pollen limitation.

120 Our results point to three major predictions. First, we predict that collapse is very likely when  
many existing S-alleles are pre-adapted to being compatible with novel S-alleles. This is because  
122 the pre-adapted alleles eliminate their competitors when a novel specificity arises, thereby re-  
ducing the total number of surviving alleles. Second, we predict that intraspecific variation in  
124 S-allele number can sometimes be explained by an invasion of a runaway self-incompatible al-  
lele rather than a bottleneck or a transition to self-compatibility. We should therefore expect to  
126 find allopatric populations with large disparities in S-allele number, and we should expect the  
population with the smaller number to harbor an S-allele that, if introduced into the other popu-  
128 lation, would trigger a collapse. Third, populations that have recently undergone such a collapse  
should be characterized by self-incompatibility but low S-allele diversity, and they should show  
130 a signature of a selective sweep at the S-locus but greater polymorphism outside it.

## Model and Results

132 The risk of contraction in S-allele number in the solanaceous incompatibility system is rooted  
in the system's biological details. This system involves two kinds of complementary products:  
134 pistil-expressed ribonucleases (RNases) (McClure et al. 1989) and pollen-expressed F-box pro-  
teins (Lai et al. 2002; Entani et al. 2003; Sijacic et al. 2004). Together, these products achieve a  
136 form of collaborative nonself-recognition first described by Kubo et al. (2010). Under this sys-  
tem, each "allele" at the S-locus is actually a tightly linked haplotype containing one RNase gene  
138 and a collection of paralogous F-box genes. The RNase gene is highly polymorphic, and each  
functionally distinct haplotype possesses a different RNase allele. Nonself pollen is recognized  
140 through the complement of F-box proteins it expresses. Each F-box paralog produces a function-  
ally distinct product, and each of these products is capable of detoxifying one or more forms  
142 of RNase. Pollen is only successful if it expresses both of the two F-box proteins to match the  
diploid pollen recipient's two RNase alleles. Self-fertilization is prevented because each fully

144 functional haplotype lacks a functional copy of the F-box gene that corresponds to the RNase  
on the same haplotype, and so each pollen grain necessarily lacks one of the two F-box proteins  
146 required to fertilize the plant that produced it. Rejection is not restricted to self-pollination: any  
two individuals that share one haplotype will reject half of each other's pollen, while individ-  
148 uals that share both haplotypes are completely incompatible. Rejection is therefore more likely  
between closely related individuals. Tight genetic linkage across all components of the S-locus  
150 reduces the probability that recombination will cause a haplotype to lose a functional F-box par-  
alog (reducing its siring opportunities) or gain the F-box paralog that detoxifies its own RNase  
152 (inducing self-compatibility).

This system presents two novel challenges that are absent in self-recognition systems. The  
154 first is a "chicken-egg problem." A novel F-box specificity alone is at best neutral because it  
detoxifies an RNase that does not yet exist. A novel RNase alone is deleterious because it de-  
156 grades all pollen and renders the plant ovule-sterile. Both of these mutations must invade in  
order to generate a new, fully functional S-haplotype. Second, for every novel RNase that arises,  
158 the corresponding F-box specificity must appear on every other haplotypic background in order  
to restore cross-compatibility among all haplotypes. Building on the hypothesis for expansion  
160 of haplotype number proposed by Fujii et al. (2016), Bod'ová et al. (2018) showed how cross-  
compatibility could be restored among all incompatibility classes after novel RNase and F-box  
162 mutations have invaded. If an initially neutral F-box mutation already exists when its com-  
plementary RNase mutation arises, the F-box mutation will then invade because it confers the  
164 advantage of compatibility with the new RNase. To restore full cross-compatibility among hap-  
lotypes, all haplotypes must acquire F-box paralogs complementary to all RNase alleles other  
166 than their own either through gene conversion (Fujii et al. 2016) or recurrent mutation (Bod'ová  
et al. 2018). This means that the haplotype bearing the RNase mutation must also acquire the F-  
168 box complementary to its ancestor. Once this occurs, the resulting haplotype is compatible with  
pollen recipients carrying all other haplotypes, but haplotypes still lacking the new F-box are not  
170 compatible with pollen recipients carrying the new RNase. As the RNase mutation increases in  
frequency, siring opportunities decrease for haplotypes that still lack the new F-box, and they  
172 are gradually driven extinct. If all doomed haplotypes acquire their missing F-box before they  
are lost, expansion has occurred. But if some doomed haplotypes go extinct, their RNase alleles  
174 are lost and contraction has occurred. Bod'ová et al. (2018) simulated the dynamics of this pro-  
cess along with several other expansion pathways and found that up to 14 haplotypes could be

176 maintained.

Based on this biological background, we introduce a set of metaphors to make the interactions  
178 among haplotypes more intuitive. Each form of pistil-function RNase is a lock, and each form  
of pollen-function F-box protein is a key. A diploid plant codominantly expresses two different  
180 locks in its pistils. Each pollen grain expresses every paralogous key in its haploid genome,  
and these keys collectively form that pollen grain's key ring. The pollen must unlock both of the  
182 pollen recipient's locks in order to fertilize it, which requires keys to both locks. Each haplotype is  
self-incompatible because its key ring lacks the key to the lock on the same haplotype. Our model  
184 must explain two processes: the invasion of a novel lock and the evolution of the complementary  
key on other haplotypes.

### 186 *Initial conditions*

We focus on a population without any self-compatible haplotypes. Several models of incom-  
188 patibility evolution include a self-compatible intermediate (Uyenoyama et al. 2001; Gervais et al.  
2011; Bod'ová et al. 2018), which can either lead to expansion or to total collapse of incompati-  
190 bility. Self-compatible haplotypes do not lose siring opportunities as their frequency increases,  
so they are not under the same negative frequency-dependence as functional incompatibility  
192 haplotypes. If inbreeding depression is low, self-compatibility is often universally superior to  
self-incompatibility, and the population will eventually become completely self-compatible at  
194 equilibrium (Uyenoyama et al. 2001; Gervais et al. 2011; Bod'ová et al. 2018). We do not re-  
tread this well-established result. Our population can instead be interpreted as one in which  
196 inbreeding depression is so great that any self-compatible haplotypes produced by mutation or  
gene conversion are effectively instantly removed by selection, although we do not explicitly  
198 model inbreeding depression.

Evolution of a new incompatibility class requires both a new lock and a new key. A lock  
200 mutation without a corresponding key would cause ovule sterility to the mutant carrying it and  
would thus be quickly eliminated, but it would not otherwise affect the population. In contrast, a  
202 key to a not-yet-extant lock would be neutral as long as there were no cost of expressing it. There  
should therefore be conditionally neutral functional diversity among duplicate keys. If a series  
204 of unsuccessful lock mutations culminates in one that corresponds to an extant key, the final  
mutation will appear to have been anticipated by that key. We therefore model the key appearing  
206 before its complementary lock with the knowledge that this pair of mutations may have been



preceded by a series of pairs that occurred in the “wrong” order. The new lock allele then arises  
208 from its ancestral lock allele on one of the existing haplotypes. Biologically, this corresponds to  
a mutation changing the specificity of one of the existing RNase alleles such that its product is  
210 now recognized by a different F-box protein and no longer by the old one. Note that there are  
two other possible results of gene conversion besides adding a key to a key ring. First, gene  
212 conversion may replace a functional F-box paralog with a non-functional or deleted allele: i.e.,  
it may remove a key. Such a conversion event should reduce the siring success of the haplotype  
214 and be unconditionally deleterious. Second, gene conversion may induce self-compatibility by  
uniting a key with its complementary lock. This conversion event should also be deleterious if SI  
216 is maintained by intense inbreeding depression. These convertants certainly occur, but we do not  
track them because they should be removed rapidly. Note that our gene conversion parameter,  
218 which includes only conversions that add a key without inducing self-compatibility, is therefore  
smaller than the raw rate of functional gene conversion, which also includes the production of  
220 short-lived deleterious convertants. Rather than speculate on the empirical proportions of these  
kinds of conversion events, we simply vary the rate of key additions that maintain SI.

222 A major barrier to expansion without a self-compatible intermediate is that, unless all other  
haplotypes possess the new key, the new lock mutation will necessarily reduce the amount of  
224 compatible pollen the mutant plant receives. If this reduced pollen supply reduces the mutant’s  
seed set, the mutation will be eliminated by selection because it provides no countervailing  
226 advantage. However, plants in large populations with efficient pollination may be so pollen-  
saturated that even a small compatible proportion is sufficient to achieve full seed set. We model  
228 such a population because it provides a biologically plausible (though probably not general)  
scenario in which a self-incompatible lock mutant can persist. Large populations are also the  
230 most conducive to expansion for reasons discussed below, so the absence of pollen limitation of  
seed set may be most realistic for the populations in which expansion is most likely. Strictly,  
232 though, the lock mutation can be neutral even if the mutant suffers some pollen limitation: it  
must merely suffer no more pollen limitation than average.

234 We consider a population with  $n$  initial complete haplotypes, each at frequency  $1/n$  (Wright  
1939). When one new lock mutation appears, we identify five classes of haplotypes (summarized  
236 in fig. 1). The mutation of the new lock is the first in a four-step evolutionary pathway to  
expansion or collapse (fig. 2). First, there are  $n_L$  haplotypes in the class that possesses one of the  
238 initial  $n$  locks and a key ring that is “complete,” *sensu* Bod’ová et al. (2018). That is, they possess



the keys to all locks but their own, including the mutant lock. This first class is denoted  $L$  for  
240 “lucky” because its members fortuitously possess the key to the new lock. Each haplotype in this  
class initially occurs at frequency  $d_L/n$ , where  $d_L$  is an arbitrary initial fraction. Second, for each  
242 of these  $n_L$  complete haplotypes, there exists one haplotype that is identical except that it lacks  
the key to the new lock. These could represent ancestral versions of the complete haplotypes that  
244 have not yet gained the key to the new lock. This second class is denoted  $C$  for “chump” because  
members of this class are simply inferior versions of the corresponding “lucky” haplotypes. Each  
246 haplotype in this class occurs at frequency  $(1 - d_L)/n$ . Third, there are  $n_U$  haplotypes that have  
one of the initial  $n$  locks and an incomplete key ring that lacks only the key to the mutant lock.  
248 Unlike the previous class, there exists no complete version of these haplotypes initially. This third  
class is denoted  $U$  for “unlucky” because members of this class cannot unlock the new lock like  
250 the “lucky” haplotypes can, but neither must they compete with superior version of themselves  
like the “chump” haplotypes must. Each haplotype in this class occurs at frequency  $1/n$ . Fourth,  
252 there is the ancestral haplotype on which the lock mutation arose. It is like any other incomplete  
haplotype (e.g., a  $U$  haplotype) except that its key ring is identical to that of the haplotype bearing  
254 the lock mutation. This fourth class is denoted  $A$  for “ancestral” because it is ancestral to the lock  
mutant. It occurs at frequency  $(1 - d_S)/n$ , where  $d_S$  is the arbitrary initial fraction of ancestral  
256 haplotypes that have been replaced with lock-mutant haplotypes. Fifth, there is the haplotype  
bearing the lock mutation. Unlike all other incomplete haplotype classes, the key that it lacks is  
258 the key to its ancestor rather than the key to the new lock. It is denoted  $S$  for “spiteful” because  
the lock mutation does not increase the haplotype’s own fitness, but it does decrease the fitness  
260 of the “unlucky” and “chump” haplotypes. (Strictly, this is a case of ammensalism rather than  
spite.) There are thus  $n_L + n_U + 1 = n$  pre-existing haplotypes (including the mutant’s ancestor)  
262 along with the mutant itself for a total of  $n + 1$  haplotypes.

These classes occur at initial frequencies,

$$\begin{aligned}p_L^{(0)} &= \frac{n_L d_L}{n} \\p_C^{(0)} &= \frac{n_L (1 - d_L)}{n} \\p_U^{(0)} &= \frac{n_U}{n} \\p_A^{(0)} &= \frac{1 - d_S}{n} \\p_S^{(0)} &= \frac{d_S}{n}\end{aligned}$$

264 where each  $p$  represents the frequency of all haplotypes of a given class. That is, the population  
begins with lock alleles at equal frequencies (as expected at equilibrium before the origin of the  
266 new lock) except that a fraction  $d_S$  of copies of  $A$  are replaced by copies of  $S$ , which induces the  
distinction between the  $L$  and  $C$  classes.

#### 268 *Invasion of key to novel lock*

The population has now passed through the “mutation” step, the first of the four-step pathway  
270 (fig. 2). The existence of the new lock fundamentally changes the fitness function in the popu-  
lation. Previously, pollen of each haplotype was equally compatible with all other haplotypes.  
272 After the new lock arises, pollen with the new key has an advantage over pollen without it. The  
fitness gained by a haplotype for being compatible with a particular diploid genotype depends  
274 on the frequency of competitors for that genotype. The ability to fertilize a genotype is more  
advantageous when fewer other haplotypes can also fertilize it. At the instant the lock allele  
276 arises, all individuals other than those carrying the new lock allele can be fertilized by the same  
fraction of the pollen pool,

$$F^{(0)} = \frac{n - 2}{n}$$

278 because only two haplotypes (those matching one of the pollen recipient’s pair) are incompatible  
as sires with a given pollen recipient. In contrast, individuals carrying  $S$  possess the new lock  
280 and can only be fertilized by some fraction of  $L$  pollen,

$$F_{LS} = F_{CS} = \frac{n_L - 1}{n_L} p_L$$

$$F_{US} = p_L.$$

where the subscript indicates a diploid genotype. Genotypes  $AA$ ,  $AS$  and  $SS$  do not exist because  
 282 the  $A$  and  $S$  haplotypes are mutually cross-incompatible as well as self-incompatible.

Since all individuals are assumed to be equally fecund as ovule parents and equally viable,  
 284 all variation in fitness is determined by siring success. The siring success of a given haplotype  
 on a given dam genotype is equal to the frequency of the dam genotype times the frequency  
 286 of the sire haplotype among all pollen compatible with the dam. We therefore define  $D_{XY}$  of  
 diploid genotype  $XY$  as the frequency of  $XY$  divided by the fraction of pollen compatible with  
 288  $XY$ . Comparing marginal fitnesses,  $w$ ,

$$w_C = \frac{1}{2} + \frac{1}{2} \left[ \frac{n_L - 2}{n_L} (D_{LL} + D_{CC} + D_{LC}) \right. \\ \left. + \frac{n_L - 1}{n_L} (D_{LU} + D_{LA} + D_{CU} + D_{CA}) \right. \\ \left. + D_{UU} + D_{UA} \right],$$

where each  $P$  represents the frequency of a diploid genotype defined in terms of the two classes of  
 290 haplotypes it possesses. An  $L$  haplotype can fertilize everything the corresponding  $C$  haplotype  
 can, and it can also fertilize individuals carrying the  $S$  haplotype, so

$$w_L = w_C + \frac{1}{2} \left[ \frac{n_L - 1}{n_L} (D_{LS} + D_{CS}) + D_{US} \right].$$

292 Although  $U$  haplotypes are compatible with all  $L$  haplotypes, they are otherwise like  $C$  haplo-  
 types:

$$w_U = \frac{1}{2} + \frac{1}{2} \left[ \frac{n_U - 2}{n_U} D_{UU} + \frac{n_U - 1}{n_U} (D_{LU} + D_{CU} + D_{UA}) \right. \\ \left. + D_{LL} + D_{CC} + D_{LC} + D_{LA} + D_{CA} \right].$$

294 The  $A$  and  $S$  haplotypes have equal fitnesses because, although they have different locks, they

have identical key rings and thus identical siring prospects:

$$w_A = w_S = \frac{1}{2} + \frac{1}{2} [D_{LL} + D_{LC} + D_{LU} + D_{CC} + D_{CU} + D_{UU}].$$

296 We find that  $w_L > w_C$  as long as  $D_{LS}$ ,  $D_{CS}$ , or  $D_{US} > 0$  (i.e., as long as  $S$  exists). That is, as long  
as  $L$  haplotypes have a functional key that  $C$  haplotypes lack,  $L$  haplotypes have greater fitness.  
298 When  $S$  does not exist,  $w_C = w_L$ . Therefore,  $w_C < w_L$  as long as  $S$  persists throughout, and all  
 $C$  haplotypes are lost at equilibrium. At the initial allele frequencies, the fitnesses  $w_A$  and  $w_S$   
300 conveniently reduce to

$$w_A^{(0)} = w_S^{(0)} = 1.$$

Allele  $S$  initially invades if  $w_S^{(0)}$  is greater than the initial mean fitness across the haplotypes,  
302  $\bar{w}^{(0)}$ , which is true if

$$n_L (1 - w_C^{(0)}) + n_U (1 - w_U^{(0)}) > d_S. \quad (1)$$

This condition essentially expresses the requirement that there is a sufficient number ( $n_L$  or  $n_U$ )  
304 of sufficiently unfit ( $1 - w_C^{(0)}$  or  $1 - w_U^{(0)}$ ) haplotypes such that the lock mutation benefits from  
their decrease in frequency, and that this quantity must be greater the more copies of the lock  
306 mutant there are initially ( $d_S$ ). Numerical iteration suggests that this condition is not stringent:  
we considered values of  $n_L, n_U \geq 2$  and always found the lock mutation to increase at least  
308 slightly.

### *Equilibration of haplotype frequencies*

310 The genotype frequency recursion equations (see Appendix) are not linear functions of genotype  
frequencies, so we cannot derive a vector of equilibrium genotype frequencies by simply solving  
312 for an eigenvector of a recursion matrix. Instead, we numerically iterate the genotype frequency  
recursions for 4000 generations to generate the equilibrium genotype frequencies given  $n_U, n_L, d_L,$   
314 and  $d_S$ . We held  $d_L$  and  $d_S$  both constant at 0.01, and varied  $n_U$  and  $n_L$  through all combinations  
of the values 2, 5, 10, and 20 haplotypes. For all these scenarios, the haplotype classes  $L, A,$   
316 and  $S$  increased in frequency, while classes  $C$  and  $U$  decreased. A representative example with  
 $n_L = n_U = 2$  is plotted in figure 3 for the first 1000 generations. Class  $C$  approached extinction,

318 and almost all gains went to class *L*. Classes *A* and *S* increased only slightly in frequency.

### *Acquiring the new key through gene conversion*

320 The population has now passed through the “invasion” step, the second in the four-step pathway  
(fig. 2). At this point, only a fraction of the population can unlock the new lock. Furthermore, the  
322 haplotype with the new lock lacks the key to its ancestor’s lock. But a fully functional haplotype  
is one that, in pollen, allows fertilization of all plants lacking the same haplotype and, in styles,  
324 only prevents fertilization by pollen carrying the same haplotype. To produce such complete  
haplotypes, all haplotypes except the one possessing the new lock must acquire the key to that  
326 lock, and the haplotype with the new lock must acquire the key to its ancestor’s lock. It would  
be extremely unlikely for each haplotype to acquire the new key by an independent mutation.  
328 The new key is also unlikely to be copied to other key rings through recombination because  
recombinational exchange is rare within the *S*-locus. However, the low observed allelic diversity  
330 at a given *F*-box paralog locus suggests that these loci have undergone recent gene conversion  
events (Kubo et al. 2015). Fujii et al. (2016) have shown that if repeated gene conversion events  
332 copy the new key to other key rings in series, the products of gene conversion will replace their  
ancestors without the new key.

334 We follow Fujii et al. (2016) in modeling the evolution of cross-compatibility through gene  
conversion. However, as Bod’ová et al. (2018) showed, adding a new key to a haplotype can in  
336 some cases give it a universal advantage over others (i.e., an advantage present at any frequency)  
and potentially drive the others extinct. In particular, if the *S* haplotype acquires the key to  
338 its ancestor’s lock, the resulting haplotype is compatible as a sire with every other haplotype,  
but only a subset of haplotypes are compatible with it. Numerical iteration shows that such a  
340 haplotype will rise to high frequencies and eliminate every haplotype that lacks the key to the  
new lock (fig. 4). These lost haplotypes include all of the *U* haplotypes along with the lock alleles  
342 they carry. Therefore, the overall process results in a collapse in haplotype number at equilibrium  
rather than expansion.

### *Evolutionary rescue of doomed haplotypes*

344  
The population has now passed through the “conversion” step, the third in the four-step path-  
346 way (fig. 2). Multiple haplotypes are now doomed to extinction at equilibrium. However, if a  
doomed haplotype acquires the key to the new lock before equilibrium is reached, the resulting

348 haplotype's fitness increases with the frequency of the new lock. This should protect the result-  
ing gene convertant from being driven from low frequencies to extinction. It may therefore be  
350 possible for doomed haplotypes to be rescued by gene conversion. If all haplotypes are rescued  
before any one of them is lost, then the number of lock alleles at equilibrium is one greater than  
352 the initial number, and expansion has occurred. Bod'ová et al. (2018) previously noted the role of  
evolutionary rescue in this pathway, though they modeled it through recurrent mutation rather  
354 than gene conversion. Gene conversion, which Kubo et al. (2015) hypothesized to be responsible  
for spread of a new key, differs from mutation in several relevant ways. First, whereas a rescuing  
356 mutation can occur in any individual carrying a doomed haplotype, functional gene conversion  
can only occur in individuals carrying both a doomed and a complete haplotype. Gene conver-  
358 sion therefore offers a smaller supply of rescues than does an equal rate of mutation and should  
provide a lesser probability of rescue. This discrepancy should be minimized when doomed  
360 haplotypes, and thus individuals carrying two doomed haplotypes, become rare. There should  
thus be a form of negative feedback in which the supply of rescuing gene convertants is initially  
362 reduced but approaches that of the rescue-by-mutation case as the doomed haplotypes approach  
extinction. Second, gene conversion does not require recurrent mutations to produce the same  
364 key on each doomed haplotype: only a single mutational origin of the rescuing key is necessary.  
It is conceivable that rescue occurs both through gene conversion and recurrent mutation, but if  
366 rescuing mutations are much rarer than rescuing gene conversions, as seems plausible, the sup-  
ply of rescues may be approximated by the rate of gene conversion alone. Bod'ová et al. (2018)  
368 modeled the improbability of recurrent mutation by allowing each key mutation to produce one  
out of an often large finite set of possible keys, and only those complementary to a currently  
370 invading lock could rescue a haplotype. By modeling only gene conversion, we can ignore the  
larger set of possible keys and instead focus on the rescuing key.

372 It is also possible that the lock mutant's ancestral haplotype acquires the key to the new  
lock before the mutant acquires the key to its ancestor's lock. The main difference is that, since  
374 all other extant haplotypes already possess the key to the ancestor's lock, only the novel lock  
must be rescued. Failure to rescue the novel lock will result in a return to the *status quo* rather  
376 than a contraction. However, if the novel lock is rescued, the resulting haplotype will begin to  
exclude the haplotypes lacking its key. The process is nearly identical to the case in which the  
378 mutant acquires its ancestor's lock before the ancestor acquires its lock, except that the ancestor  
is already rescued at the beginning of the process, and the novel lock begins at a lower frequency.

380 We model the invasion of the novel lock, which is necessary for expansion or contraction, but not  
the rescue of the novel lock, which may or may not occur before its invasion.

382 The underlying mathematics of this rescue process are similar in form to the evolutionary  
rescue of a declining population by new mutation. The lock-mutant's acquisition of its ancestor's  
384 key is a kind of change in the (genetic) environment, the declining frequency of the doomed  
haplotype is analogous to a declining population, and the acquisition of the new key by the  
386 doomed haplotypes is analogous to the generation of new beneficial mutations. We therefore  
base our model on an existing model of evolutionary rescue by new mutations (Orr and Unckless  
388 2008). There are two components of this model: the supply of beneficial mutations and the  
probability that any one of them will survive. The probability that the population is rescued  
390 is the probability that at least one of these mutations survives. Similarly, the probability that a  
haplotype is rescued is the probability that at least one copy adds the new key to its key ring  
392 and survives. Orr and Unckless (2008) used a model of survival probability in a population of  
decreasing size (Otto and Whitlock 1997), which is itself a modification of the branching-process  
394 model used by Fisher (1923) and Haldane (1927). However, we modify the original model in  
a different way because, although the declining frequency of the doomed haplotype affects the  
396 supply of gene convertants in the same way as a declining population, the effect on survival  
probability is different. The declining frequency alters the frequency-dependent fitness of the  
398 potentially rescuing gene convertants and thus their survival probability. Rather than varying the  
population size over time, we vary the selection coefficient as a function of genotype frequencies.

400 In the original model (Orr and Unckless 2008), selection for the rescuing mutation is uncon-  
ditionally positive. Survival thus implies eventual fixation, and the survival probability equals  
402 the fixation probability. In contrast, self-incompatibility involves balancing selection among hap-  
lotypes, so survival does not imply fixation. But since the branching-process approximation is  
404 actually the probability of surviving early drift, it can be used in either case. Haldane defined  $s$   
as the number of additional offspring produced by the mutant haploid individual above the pop-  
406 ulation average. In our model,  $s$  can be re-interpreted as the additional number of descendant  
copies of a gene convertant above the average for all haplotypes. Calculating the relative differ-  
408 ence between the marginal fitness of the gene convertant,  $w_R$ , and the mean fitness,  $\bar{w}$ , which we



define as the selection coefficient  $s$ ,

$$\begin{aligned}
 s = w_R - \bar{w} = & \\
 & 0.5 \left[ D_{LL} \left( 1 - \frac{n_L - 2}{n_L} p_L - p_U - p_S \right) \right. \\
 + D_{LU} & \left( \frac{n_U - 1}{n_U} - \frac{n_L - 1}{n_L} p_L - \frac{n_U - 1}{n_U} p_U - p_S \right) \\
 & + D_{LS} \left( 1 - \frac{n_L - 1}{n_L} p_L \right) \\
 + D_{UU} & \left( \frac{n_U - 2}{n_U} - p_L - \frac{n_U - 2}{n_U} p_U - p_S \right) \\
 & \left. + D_{US} \left( \frac{n_U - 1}{n_U} - p_L \right) \right]. \tag{2}
 \end{aligned}$$

410 The survival probability for a single gene convertant is thus frequency-dependent, which complicates the calculation of the probability that at least one gene convertant survives.

412 In the model of Orr and Unckless (2008), the population declines at a predictable rate determined by a standard model of negative population growth. This allowed them to express the  
 414 number of mutations per generation as a function of time. We cannot do the same with the number of gene conversions per generation because we do not know the genotype frequencies  
 416 as a function of time. We can, however, numerically iterate recursion equations to get a trajectory of genotype frequencies. We can then retroactively calculate the expected number of gene  
 418 conversions each generation in this hypothetical history as a product of the per-individual gene conversion rate, the total number of individuals, and the frequency of heterozygotes for the key  
 420 to the new lock.

Population size and gene conversion rate have no effect on the survival or rescue probability except through their product, so this product is reported as a single compound parameter  
 422  $R_{\text{conversion}}$  (conversion-individuals per heterozygote per generation: the exact number of conversions per generation depends on the number of heterozygotes for the key). Note that we use  
 424 deterministic approximations for the genotype frequency trajectory and the supply of potentially rescuing gene convertants each generation. All stochasticity arises from whether each potentially  
 426 rescuing convertant actually survives.

428 The probability of rescue depends on the probability of survival of a new gene convertant.

We numerically approximated the survival probability of a new gene convertant using

$$s = \sum_i^{\infty} \frac{P(\text{survival})^{i-1}}{i} \quad (3)$$

430 from Haldane (1927). The survival probability of a hypothetical gene convertant was approxi-  
mated through the following procedure. Each generation, we chose a survival probability that,  
432 when substituted into equation (3) (truncated to the first 100 terms of the sum), resulted in  
a selection coefficient closest to the value calculated through equation (2). Proposed survival  
434 probabilities were taken from the sequence from 0 to 1 in increments of 0.01. We checked this  
approximation against simulations for each generation of a common genotype frequency trajec-  
436 tory with  $n_L = 2$ ,  $n_U = 2$ , and  $N = 10,000$ . The actual survival probability was determined by  
simulating the survival of a new gene convertant conditional on arising in a given generation.  
438 The convertant was judged to have survived if it survived for at least ten generations. The ap-  
proximation closely followed the simulated results (fig. S1), so we used the approximation for all  
440 future calculations.

Once the genotype frequencies, the expected number of gene convertants, and the survival  
442 probability of a new gene convertant were known for every generation, we calculated the proba-  
bility that none of them survived as the product of the complements of the survival probability.  
444 The complement of this probability is the probability that one doomed haplotype is rescued,  
assuming the expected number of gene convertants under the expected genotype frequency tra-  
446 jectory. We approximated the probability that a given number of haplotypes were rescued as the  
probability that each of them was rescued independently. The rescue probabilities are not strictly  
448 independent because one rescue event alters the trajectory of genotype frequencies. However,  
they may be approximately independent if the rescue events occur in a relatively short period  
450 before genotype frequencies can be greatly altered. Orr and Unckless (2008) found that rescue  
is most likely to occur early in the process when mutation supply is highest, so it is plausible  
452 that rescues also occur in a short period in our model. This procedure resulted in a probability  
distribution of the number of surviving haplotypes after rescue or collapse. A natural question  
454 is, are large collapses guaranteed, or is there a non-trivial probability of expansion?

For all iterations, we assumed that at least two haplotypes had already acquired the key to  
456 the new lock. This is the minimum number for the lock-mutation not to confer ovule-sterility  
because, if only one haplotype could fertilize it, all ovules carrying the lock-mutation would be

458 fertilized by the same pollen haplotype. The maternal haplotype of the resulting offspring would  
be incompatible with all pollen except the paternal haplotype, which would be incompatible  
460 with itself. Therefore, when there is exactly one haplotype of class  $L$ , all ovules carrying the lock  
mutation grow up to be ovule-sterile adults. We calculated the probability that all haplotypes  
462 survived for all combinations of  $n_L = 2, 5, 10, 20$ ,  $n_U = 2, 5, 10, 20$ , and  $R_{\text{conversion}}$  in the range of  
0.1 – 1 in increments of 0.01 and the range of 1 – 10 in increments of 0.1.

464 We found that the probability that all haplotypes were rescued (the expansion probability)  
decreased with the number of doomed haplotypes and increased with the population rate of gene  
466 conversion  $R_{\text{conversion}}$  (fig. 5). For  $n_L = 2$ , the expansion probability rapidly saturated near 1.0  
as  $R_{\text{conversion}}$  increased regardless of  $n_U$ . The expansion probability greatly decreased for  $n_L = 3$   
468 relative to  $n_L = 2$  and continued decreasing gradually for larger values of  $n_L$ . The expansion  
probability never reached 0.5 for  $n_L \geq 3$ . The effect of  $n_U$ , which was to decrease the expansion  
470 probability, was larger for larger  $n_L$ .

The distribution of haplotype number after rescue/collapse responded similarly to  $R_{\text{conversion}}$   
472 for different values of  $n_L$ , gradually shifting rightward toward maintenance of the initial number  
of haplotypes, but never reaching high probabilities of expansion for  $R_{\text{conversion}} \leq 0.1$  (fig. 6). For  
474  $n_L = 2$  and  $n_L = 5$ , the modal outcome was loss of all or almost all doomed haplotypes.

### *Long-term behavior*

476 The population has now passed through the final “rescue/collapse” step of the four-step path-  
way (fig. 2). However, natural populations may traverse this pathway repeatedly, and they must  
478 have undergone successive rounds of expansion to produce their current haplotypic diversity.  
The distribution of haplotype number in nature should therefore be governed by the long-term  
480 balance between collapse and expansion. We can make crude predictions for the long-term evo-  
lution of haplotype number by treating different haplotype numbers as states in a Markov chain.  
482 The transition process works as follows. In the initial state, there are  $n = n_L + n_U + 1$  unique  
lock alleles, including the one carried by the single haplotype of class  $A$ . After the new lock  
484 invades, there are  $n + 1$  locks, now also including that of the single haplotype of class  $S$ . After  
the rescue/collapse phase, the new state is the number of surviving lock alleles, ranging from  
486  $n' = n - n_U = n_L + 1$  (no locks are rescued; only those sharing a haplotype with a complete key  
ring survive) to  $n' = n + 1 = n_L + n_U + 2$  (all locks are rescued). Assuming that haplotype num-  
488 ber changes only through the foregoing pathway, the stationary distribution of this Markov chain

represents the probability distribution for haplotype number at the expansion-collapse equilibrium. Other unmodeled processes, such as bottlenecks or alternative diversification pathways, may decrease or increase the number observed in nature relative to the values predicted by the Markov chain.

At the end of one transition, all haplotypes possess the key to the lock that just invaded. However, this does not imply anything about whether they possess the key to the next lock to invade. The haplotypes that were lucky with respect to one lock may be unlucky with respect to the next. The outcome of the rescue process therefore tells us  $n'$  but not  $n'_L$  or  $n'_U$  individually. We assume that  $n_L$  remains a constant parameter between states, and that all changes in haplotype number are represented by changes in  $n_U$ .

Our rescue probability calculations showed that expansion was likely even from large initial haplotype numbers when  $n_L = 2$  and  $R_{\text{conversion}} \geq 0.1$  (fig. 5). Such large expansion probabilities are necessary to produce the many haplotypes observed in nature. To cover a range of expansion probabilities, we examined  $R_{\text{conversion}} = 0.1\text{--}0.9$  in intervals of 0.1, as well as  $R_{\text{conversion}} = 0.01$  and 1. The low value of  $n_L = 2$  is biologically reasonable because an initially neutral key would likely be present on few key rings. (A value of  $n_L = 1$  may be even more common, but it would impose a severe penalty on the new lock:  $LS$  would become the only  $S$ -bearing genotype and would be ovule-sterile.)

The time steps in this Markov process are somewhat abstract: they represent the waiting times between the invasion of one lock and the next. In reality, they would be variable in length. However, neither rescue nor collapse can occur during these periods. The length of each waiting period is therefore irrelevant to the diversification process we modeled, though it may affect the opportunity for bottlenecks or alternative diversification pathways. Since we were unable to map the waiting periods onto chronological time, we ignored the dynamics of the process and focused on the ultimate stationary distribution. Preliminary trials showed that the final distribution was unaffected by the initial distribution, and we set the initial distribution such that all probability was concentrated at  $n_U = 1$ .

Our numerical iterations required a transition matrix of finite size. We therefore enforced an upper boundary of 40 incomplete haplotypes, near the upper range observed in nature (Lawrence 2000). With the fixed value of  $n_L = 2$ , this resulted in up to 42 total haplotypes. Any non-zero probability of expanding beyond this maximum was instead treated as additional probability of remaining at the maximum. We also enforced a lower boundary at the biological minimum of

$n = 3$ : below this value, all plants reject all pollen and the population is completely sterile. Any  
522 non-zero probability of collapsing to a state in which  $n < 3$  was instead treated as additional  
probability of transitioning to  $n = 3$ .

524 We found that the stationary distribution shifted toward greater numbers of haplotypes as  
 $R_{\text{conversion}}$  increased (fig. 7). At  $R_{\text{conversion}} = 0.01$ , almost all probability was concentrated at  
526 the biological minimum of three haplotypes, while at  $R_{\text{conversion}} = 1$ , almost all probability was  
concentrated at 40 haplotypes, the maximum we allowed. In the range from  $R_{\text{conversion}} = 0.1$ – $0.3$ ,  
528 the stable distribution was centered around intermediate values in the range 3–40.

## Discussion

530 We used an evolutionary rescue model to estimate the relative probabilities of expansion and  
contraction in S-haplotype number, calculate the distribution of contraction magnitudes, and  
532 predict the long-term evolution of haplotype number. We find that expansion from low haplo-  
type number is possible if gene conversion is frequent or the population is large, but that the  
534 possibility of contraction is ubiquitous. These collapses can be large, easily resulting in the loss  
of the majority of S-haplotypes. A unique prediction of this model is that recently bottlenecked  
536 populations should have a “debt” such that, once the appropriate gene conversion event occurs,  
they will experience a sudden reduction in haplotype number in addition to the reduction di-  
538 rectly caused by the bottleneck. The long-term maintenance of haplotype number is therefore  
more precarious than previously appreciated.

540 This vulnerability is a necessary consequence two very reasonable premises along with what  
is known empirically about the control of self-incompatibility. First, we assumed that gene con-  
542 version can copy any F-box specificity from one haplotype to another. This is consistent with  
the low observed polymorphism among alleles of a given F-box paralog despite their long co-  
544 existence (Kubo et al. 2015). Second, we assumed that the supply of compatible pollen did  
not limit seed set. Pollen limitation certainly occurs in nature: for self-incompatible plants sur-  
546 veyed in the literature, Larson and Barrett (2000) found on average a 59% increase in fruit set for  
pollen-supplemented flowers relative to open-pollinated flowers, significantly greater than the  
548 31% average for self-compatible species. However, even their set of 66 self-incompatible species  
contained over 10 species with 0-20% pollen limitation. Self-incompatible populations with little  
550 pollen limitation may therefore be moderately frequent, even if they are not the norm.

Despite the possibility of collapse, we found that stable distributions of haplotype number

552 within the range of 20–40 were possible in the long term. These numbers are greater than the  
upper limit of 14 haplotypes found in the model of Bod'ová et al. (2018), and they are within  
554 the range found in nature. This discrepancy is most likely due to the large supplies of rescuing  
gene convertants we modeled, and it shows that arbitrarily many haplotypes can be maintained  
556 if the population is large or gene conversion is rapid. Population size and S-haplotype number  
have rarely been estimated for the same populations. However, complete sampling of three pop-  
558 ulations of *Pyrus pyraster*, a rare woody perennial, revealed 9–25 S-haplotypes per population  
despite small ( $N = 8–88$ ) population sizes (Hoebee et al. 2011). Our model fails to predict the  
560 maintenance of so many haplotypes in such small populations at equilibrium, but it is possible  
that these populations are not at equilibrium. If the waiting times between successive RNase  
562 invasions are long, then it is possible that collapses in haplotype number lag far behind reduc-  
tions in population size. In this case, we should predict that S-haplotype number will drop  
564 precipitously in *P. pyraster* in the (possibly distant) future.

The rate at which gene conversion copies a functional F-box from one haplotype to another is  
566 unknown. Per-nucleotide rates of gene conversion have been estimated to be 400 times the rates  
of crossovers in *Drosophila* (Gay et al. 2007). Assuming a crossover rate of  $10^{-8}$  per meiosis per  
568 nucleotide, this yields a gene conversion rate on the order of  $10^{-6}$ . A functional gene conversion  
rate of  $10^{-6}$  would produce few haplotypes ( $\approx 3$ ) for populations smaller than 100,000,  $\approx 10 –$   
570 40 for populations on the order of 100,000, and larger numbers for larger populations. Such  
populations are large but not unrealistic. Note, however, that the parameter in our model is  
572 not merely the per-nucleotide rate, but the rate at which a functional F-box is gained. This rate  
excludes gene conversion events that eliminate rather than transfer a specificity as well as events  
574 that fail to affect specificity at all.

The amount of nucleotide divergence between functionally distinct F-box paralogs could  
576 serve as an upper bound on how many changes are required to convert one specificity to an-  
other. However, this quantity would also include neutral substitutions unrelated to the differ-  
578 ence in specificity. A direct but technically difficult means of estimating the rate of functional  
gene conversion would be to genotype individual pollen grains of a self-incompatible individual  
580 using long-read sequencing and to detect haplotypes with the F-box paralog corresponding to  
their own RNase. Alternatively, a self-incompatible individual could be self-pollinated. Although  
582 most pollen would be rejected, some fraction would have become self-compatible through gene  
conversion. Such spontaneous gene conversion could be distinguished from mere leaky self-

584 incompatibility either through long-read sequencing of the offspring or by further crosses. Gene-  
convertant offspring should be partially self-compatible because half their pollen possesses the  
586 F-box genes complementary to both parental RNases. Gene conversion could be distinguished  
from self-compatibility mutations in the pistil locus or modifier loci because gene convertants  
588 should still fully reject pollen from plants with the same RNase-locus genotype: only their pollen  
phenotype should change. Although both new mutations and gene conversion could add a  
590 pollen specificity and induce self-compatibility, these processes need not be distinguished be-  
cause their effects are identical from the perspective of haplotype diversification.

592 Other than large populations are rapid gene conversion, another possible explanation of high  
S-haplotype diversity is that gene flow buoys species-wide diversity despite local contractions.  
594 Uyenoyama et al. (2001) found that, similar to our results, S-allele number was unlikely to ex-  
pand within a single population because of the threat of collapse into self-compatibility. They  
596 proposed that expansion may instead occur through local turnover in S-alleles followed by in-  
troduction of the novel alleles into the broader metapopulation. However, this model assumed  
598 that incompatibility operates through self-recognition, in which introgressed S-alleles gain an  
advantage because they are compatible with resident plants that do not recognize them as self. It  
600 is thus not obvious whether the conclusion translates to nonself-recognition. Castric et al. (2008)  
found less divergence between putative shared ancestral variants of S-locus genes in *Arabidopsis*  
602 *lyrata* and *A. halleri* than between non-S orthologs, consistent with elevated introgression at the  
S-locus in this self-recognition system. Under collaborative nonself-recognition, however, each  
604 novel RNase requires a corresponding F-box. A novel introgressed RNase allele will not nec-  
essarily be detoxified by local F-box proteins, and it may thus inflict ovule-sterility. If there is  
606 insufficient compatible pollen to support the migrant haplotype, self-incompatibility may act as  
a barrier to introgression not just at the S-locus, but genome-wide. This barrier could be over-  
608 come, but it would require either that the key corresponding to the foreign lock already exists  
in the population (e.g., as a dual-function key or as a segregating neutral variant), or that there  
610 is sufficient migration to supply the corresponding foreign keys. Reintroduction of recently lost  
RNases, unlike introduction of truly novel RNases, should function identically under self- and  
612 nonself-recognition. Populations that have undergone a recent contraction meet this condition  
because they have lost RNases but not necessarily the corresponding F-box genes. As long as the  
614 lost RNases were reintroduced from another population before the F-box genes became pseudo-  
genized, the population could recover all lost S-haplotypes. A metapopulation can therefore still



616 provide a “safety net” that prevents permanent contraction even if truly novel RNases cannot easily spread.

618 Highly differentiated sets of RNases may even act to generate reproductive isolation. If nonself-recognition poses greater barriers to introgression than self-recognition, this tendency  
620 might partly explain species selection for self-incompatibility: clades with nonself-recognition may more rapidly undergo reproductive isolation and thus speciation. Landis et al. (2018) found  
622 either a positive effect or no effect of autogamy on net diversification in Polemoniaceae, in contrast to the negative effect of self-incompatibility on net diversification found by Goldberg et al.  
624 (2010) in Solanaceae. Although Goldberg et al. (2010) attributed the greater net diversification rate in self-incompatible species to a lesser extinction rate compared to self-compatible species  
626 rather than a greater speciation rate, it is difficult to estimate these quantities separately. If the increased diversification rate in the self-incompatible species of Solanaceae is due to isolating  
628 effects of nonself-recognition rather than from self-incompatibility *per se*, we should expect a reduced effect of self-incompatibility on diversification in families with other systems like Bras-  
630 sicaceae and Asteraceae.

We found that the expansion probability greatly decreased as the number of complete hap-  
632 lotypes increased. Greater numbers of complete haplotypes reduce the expansion probability in at least two ways. First, by increasing the number and thus the frequency of fit haplotypes, they  
634 increase the mean siring success. When compatibility with the new RNase is more common, the competitive advantage of this compatibility is reduced. Second, with more complete haplotypes,  
636 the equilibrium frequency of the novel RNase is lesser. These two effects reduce the advantage of compatibility with the new RNase and thus the survival probability of the rescuing gene con-  
638 vertant. Expansion was most likely when exactly two haplotypes were initially complete. This condition may be more biologically plausible than it first appears. Most F-box mutations should  
640 exist on only one haplotypic background because all new mutations fall into this class. However, these alleles should contribute neither to expansion nor contraction: they cannot support a  
642 corresponding RNase mutation in the first place unless they exist on at least two backgrounds. If F-box mutations on two backgrounds are the second-most-common, then they are the most  
644 common within the subset that can actually contribute to contraction or expansion.

An essential parameter of this model, the number of haplotypes pre-adapted to the novel  
646 RNase specificity, has not been systematically estimated. The existence of multiple pre-adapted haplotypes is a prerequisite for both expansion and collapse. The presence and number of

648 pre-adapted haplotypes in a population could be determined by experimentally applying naïve  
pollen to plants carrying a novel, functional RNase allele. Successful fertilization would indicate  
650 pre-adaptation to the RNase. An alternative explanation for fertilization, the loss of RNase func-  
tion in the dam, could be ruled out with the appropriate control. F-box knockouts should be  
652 compatible with RNase loss-of-function mutants but not with novel RNase alleles. Novel RNase  
alleles could be generated by mutagenesis, or they could be introduced from distantly related  
654 populations transgenically or through introgression.

Besides bounding the parameters of the model, empirical research could also test for evidence  
656 of recent historical collapses. Consider a pair of allopatric populations that initially shared all  
S-haplotypes. However, a novel RNase has recently invaded Population A and eliminated several  
658 pre-existing haplotypes, resulting in a contraction in haplotype number. This RNase never arose  
in Population B, which retains the original complement. Every remaining haplotype in Popula-  
660 tion A other than the novel haplotype itself should carry the F-box complementary to the novel  
RNase. In Population B, several haplotypes should either be polymorphic for the novel RNase's  
662 complementary F-box or should lack it entirely. This situation could be tested by reciprocally  
crossing individuals from the two populations. A substantial proportion of B pollen should  
664 be rejected: a proportion in excess of that predicted by the number and frequency of shared  
S-haplotypes. A potentially dramatic test would be to introgress the novel RNase from Popu-  
666 lation A to Population B. In the short run, the siring success of all haplotypes not pre-adapted  
to the new RNase would decrease. In the long run, the frequency of these unlucky haplotypes  
668 would decrease to extinction. That is, we predict that S-haplotype collapse should be contagious  
between closely related populations, even if both populations are self-incompatible.

670 SI has developed into a rich study system through the continued interaction between theory  
and empirical research. Experimental demonstration of the genetic control of SI (East and Man-  
672 gelsdorf 1925) and field research showing the number of S-alleles in natural populations (Em-  
erson 1938, 1939) inspired theoretical explanations of the balancing selection capable of maintaining  
674 this diversity (Wright 1939; Charlesworth and Charlesworth 1979). The theoretical potential for  
balancing selection indicated the S-locus as a candidate for long-term polymorphism, and S-allele  
676 phylogenies confirmed this possibility (Igić and Kohn 2001; Steinbachs and Holsinger 2002). The  
discovery of the fine-scale genetic basis of nonself-recognition (Kubo et al. 2010, 2015) necessi-  
678 tated new theoretical explanation of the expansion process, and this theory now points to the  
unanticipated possibility of S-allele collapse through runaway gene convertants.

680

### Appendix: genotype frequency recursions

The following genotype frequency recursions were used to determine the equilibrium genotype frequencies after the invasion of the key to the new lock (fig. 3). They were also used to produce the trajectories leading to extinction of doomed haplotypes (fig. 4), which were in turn used to calculate rescue probabilities. The genotype frequency recursions are

$$P'_{LL} = 2p_L \left[ \frac{n_L - 2}{n_L} P_{LL} + \frac{n_L - 1}{2n_L} (P_{LC} + P_{LU} + P_{LA} + P_{LS}) \right]$$

$$P'_{LC} = p_L \left[ \frac{n_L - 2}{2n_L} P_{LC} + \frac{n_L - 2}{n_L} P_{CC} + \frac{n_L - 1}{2n_L} (P_{CU} + P_{CA} + P_{CS}) \right] \\ + p_C \left[ \frac{n_L - 2}{n_L} P_{LL} + \frac{n_L - 2}{2n_L} P_{LC} + \frac{n_L - 1}{2n_L} (P_{LU} + P_{LA}) \right]$$

$$P'_{LU} = p_L \left[ \frac{n_L - 1}{2n_L} (P_{LU} + P_{CU}) + P_{UU} + \frac{1}{2} (P_{UA} + P_{US}) \right] \\ + p_U \left[ P_{LL} + \frac{1}{2} (P_{LC} + P_{LA}) + \frac{n_U - 1}{2n_U} P_{LU} \right]$$

$$P'_{LA} = p_L \left[ \frac{n_L - 1}{2n_L} (P_{LA} + P_{CA}) + \frac{1}{2} P_{UA} \right] \\ + p_A \left[ P_{LL} + \frac{1}{2} (P_{LC} + P_{LU}) \right]$$

$$P'_{LS} = p_L \left[ \frac{n_L - 1}{2n_L} (P_{LS} + P_{CS}) + \frac{1}{2} P_{US} \right] \\ + p_S \left[ P_{LL} + \frac{1}{2} (P_{LC} + P_{LU}) \right]$$

$$P'_{CC} = 2p_C \left[ \frac{n_L - 2}{2n_L} P_{LC} + \frac{n_L - 2}{n_L} P_{CC} + \frac{n_L - 1}{2n_L} (P_{CU} + P_{CA}) \right]$$

$$P'_{CU} = p_C \left[ \frac{n_L - 1}{2n_L} (P_{LU} + P_{CU}) + P_{UU} + \frac{1}{2} P_{UA} \right] \\ + p_U \left[ \frac{1}{2} (P_{LC} + P_{CA} + P_{CS}) + P_{CC} \right]$$

$$P'_{CS} = p_C \left[ \frac{n_L - 1}{2n_L} (P_{LS} + P_{CS}) + \frac{1}{2} P_{US} \right] \\ + p_S \left[ \frac{1}{2} (P_{LC} + P_{CU}) + P_{CC} \right]$$

$$P'_{UU} = 2p_U \left[ \frac{n_U - 1}{2n_U} (P_{LU} + P_{CU} + P_{UA}) + \frac{n_U - 2}{n_U} P_{UU} \right]$$

$$P'_{UA} = p_U \left[ \frac{1}{2} (P_{LA} + P_{CA}) + \frac{n_U - 1}{2n_U} P_{UA} \right] \\ + p_A \left[ \frac{1}{2} (P_{LU} + P_{CU}) + P_{UU} \right]$$

$$P'_{US} = p_S \left[ \frac{1}{2} (P_{LU} + P_{CU}) + P_{UU} \right]$$

### Literature Cited

- 686 Bod'ová, K., T. Priklopil, D. L. Field, N. H. Barton, and M. Pickup. 2018. Evolutionary pathways  
for the generation of new self-incompatibility haplotypes in a non-self recognition system.  
688 *Genetics* 209:861–883.
- Castric, V., J. Bechsgaard, M. H. Schierup, and X. Vekemans. 2008. Repeated adaptive introgres-  
690 sion at a gene under multiallelic balancing selection. *PLoS Genetics* 4.
- Charlesworth, D., and B. Charlesworth. 1979. The evolution and breakdown of S-allele systems.  
692 *Heredity* 43:41–55.
- East, E. M., and A. J. Mangelsdorf. 1925. A new interpretation of the hereditary behavior of

- 694 self-sterile plants. Proceedings of the National Academy of Sciences of the United States of  
America 11:166–171.
- 696 Emerson, S. 1938. The genetics of self-incompatibility in *Oenothera organensis*. Genetics 23:190.  
———. 1939. A preliminary survey of the *Oenothera organensis* population. Genetics 24:524.
- 698 Entani, T., M. Iwano, H. Shiba, F.-S. Che, A. Isogai, and S. Takayama. 2003. Comparative analysis  
of the self-incompatibility (S-) locus region of *Prunus mume*: identification of a pollen-expressed  
700 F-box gene with allelic diversity. Genes to Cells 8:203–213.
- Fisher, R. A. 1923. XXI.—On the dominance ratio. Proceedings of the Royal Society of Edinburgh  
702 42:321–341.
- Foote, H., J. P. Ride, V. E. Franklin-Tong, E. A. Walker, M. J. Lawrence, and F. Franklin. 1994.  
704 Cloning and expression of a distinctive class of self-incompatibility (S) gene from *Papaver rhoeas*  
L. Proceedings of the National Academy of Sciences 91:2265–2269.
- 706 Fujii, S., K.-i. Kubo, and S. Takayama. 2016. Non-self-and self-recognition models in plant self-  
incompatibility. Nature Plants 2.
- 708 Gay, J. C., S. Myers, and G. McVean. 2007. Estimating meiotic gene conversion rates from popu-  
lation genetic data. Genetics 177:881–894.
- 710 Gervais, C. E., V. Castric, A. Ressayre, and S. Billiard. 2011. Origin and diversification dynamics  
of self-incompatibility haplotypes. Genetics 188:625–636.
- 712 Goldberg, E. E., J. R. Kohn, R. Lande, K. A. Robertson, S. A. Smith, and B. Igić. 2010. Species  
selection maintains self-incompatibility. Science 330:493–495.
- 714 Haldane, J. B. S. 1927. A mathematical theory of natural and artificial selection, part V: selection  
and mutation. Pages 838–844 in Mathematical Proceedings of the Cambridge Philosophical  
716 Society. Vol. 23. Cambridge University Press.
- Hiscock, S. J., S. M. McInnis, D. A. Tabah, C. A. Henderson, and A. C. Brennan. 2003. Sporo-  
718 phytic self-incompatibility in *Senecio squalidus* L. (Asteraceae)—the search for S. Journal of  
Experimental Botany 54:169–174.
- 720 Hoebee, S., S. Angelone, D. Csencsics, K. Määtänen, and R. Holderegger. 2011. Diversity of  
S-alleles and mate availability in 3 populations of self-incompatible wild pear (*Pyrus pyraster*).  
722 Journal of Heredity 103:260–267.
- Igić, B., and J. R. Kohn. 2001. Evolutionary relationships among self-incompatibility RNases.  
724 Proceedings of the National Academy of Sciences 98:13167–13171.

- Igić, B., R. Lande, and J. R. Kohn. 2008. Loss of self-incompatibility and its evolutionary consequences. *International Journal of Plant Sciences* 169:93–104.
- Kubo, K.-i., T. Entani, A. Takara, N. Wang, A. M. Fields, Z. Hua, M. Toyoda, S.-i. Kawashima, T. Ando, A. Isogai, et al. 2010. Collaborative non-self recognition system in S-RNase-based self-incompatibility. *Science* 330:796–799.
- Kubo, K.-i., T. Paape, M. Hatakeyama, T. Entani, A. Takara, K. Kajihara, M. Tsukahara, R. Shimizu-Inatsugi, K. K. Shimizu, and S. Takayama. 2015. Gene duplication and genetic exchange drive the evolution of S-RNase-based self-incompatibility in *Petunia*. *Nature Plants* 1.
- Lai, Z., W. Ma, B. Han, L. Liang, Y. Zhang, G. Hong, and Y. Xue. 2002. An F-box gene linked to the self-incompatibility (S) locus of *Antirrhinum* is expressed specifically in pollen and tapetum. *Plant Molecular Biology* 50:29–41.
- Landis, J. B., C. D. Bell, M. Hernandez, R. Zenil-Ferguson, E. W. McCarthy, D. E. Soltis, and P. S. Soltis. 2018. Evolution of floral traits and impact of reproductive mode on diversification in the phlox family (Polemoniaceae). *Molecular Phylogenetics and Evolution* 127:878–890.
- Larson, B. M., and S. C. Barrett. 2000. A comparative analysis of pollen limitation in flowering plants. *Biological Journal of the Linnean Society* 69:503–520.
- Lawrence, M. 2000. Population genetics of the homomorphic self-incompatibility polymorphisms in flowering plants. *Annals of Botany* 85:221–226.
- Li, X., N. Paech, J. Nield, D. Hayman, and P. Langridge. 1997. Self-incompatibility in the grasses: evolutionary relationship of the S gene from *Phalaris coerulescens* to homologous sequences in other grasses. *Plant Molecular Biology* 34:223–232.
- McClure, B. A., V. Haring, P. R. Ebert, M. A. Anderson, R. J. Simpson, F. Sakiyama, and A. E. Clarke. 1989. Style self-incompatibility gene products of *Nicotiana glauca* are ribonucleases. *Nature* 342:955–957.
- Orr, H. A., and R. L. Unckless. 2008. Population extinction and the genetics of adaptation. *The American Naturalist* 172:160–169.
- Otto, S. P., and M. C. Whitlock. 1997. The probability of fixation in populations of changing size. *Genetics* 146:723–733.
- Paape, T., B. Igić, S. D. Smith, R. Olmstead, L. Bohs, and J. R. Kohn. 2008. A 15-myrr-old genetic bottleneck. *Molecular Biology and Evolution* 25:655–663.

- 756 Sakai, S. 2016. How have self-incompatibility haplotypes diversified? Generation of new hap-  
lotypes during the evolution of self-incompatibility from self-compatibility. *The American*  
758 *Naturalist* 188:163–174.
- Sijacic, P., X. Wang, A. L. Skirpan, Y. Wang, P. E. Dowd, A. G. McCubbin, S. Huang, and T.-h.  
760 Kao. 2004. Identification of the pollen determinant of S-RNase-mediated self-incompatibility.  
*Nature* 429:302–305.
- 762 Stein, J. C., B. Howlett, D. C. Boyes, M. E. Nasrallah, and J. B. Nasrallah. 1991. Molecular cloning  
of a putative receptor protein kinase gene encoded at the self-incompatibility locus of *Brassica*  
764 *oleracea*. *Proceedings of the National Academy of Sciences* 88:8816–8820.
- Steinbachs, J., and K. Holsinger. 2002. S-RNase-mediated gametophytic self-incompatibility is  
766 ancestral in eudicots. *Molecular Biology and Evolution* 19:825–829.
- Tank, D. C., J. M. Eastman, M. W. Pennell, P. S. Soltis, D. E. Soltis, C. E. Hinchliff, J. W. Brown,  
768 E. B. Sessa, and L. J. Harmon. 2015. Nested radiations and the pulse of angiosperm diversifica-  
tion: increased diversification rates often follow whole genome duplications. *New Phytologist*  
770 207:454–467.
- Uyenoyama, M. K., Y. Zhang, and E. Newbigin. 2001. On the origin of self-incompatibility  
772 haplotypes: transition through self-compatible intermediates. *Genetics* 157:1805–1817.
- Wright, S. 1939. The distribution of self-sterility alleles in populations. *Genetics* 24:538–552.



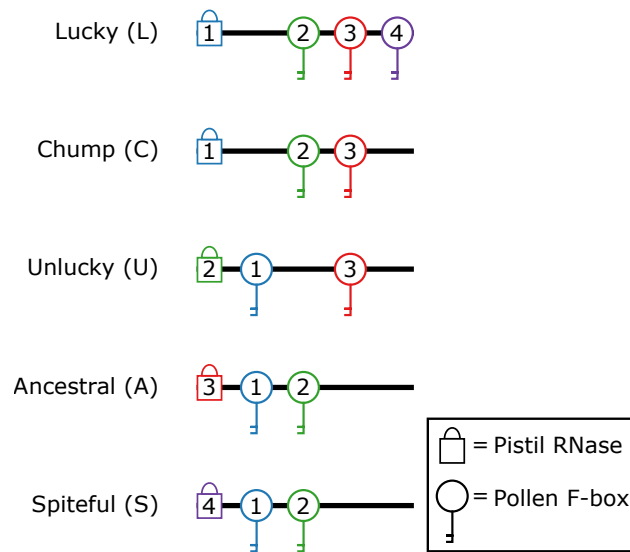

Figure 1: Haplotype classes. In this example, the population begins with three complete haplotypes, and then a fourth lock allele is introduced. The new lock arises from the “ancestral” haplotype, creating a “spiteful” haplotype which is neutral itself but decreases the fitness of the other haplotypes. All haplotypes lack the key to the new lock except for those “lucky” enough to carry it in advance, which have an advantage over the “chump” haplotypes that bear their corresponding locks. Haplotypes that are “unlucky” merely lack the new key but don’t compete against other haplotypes with their same locks.

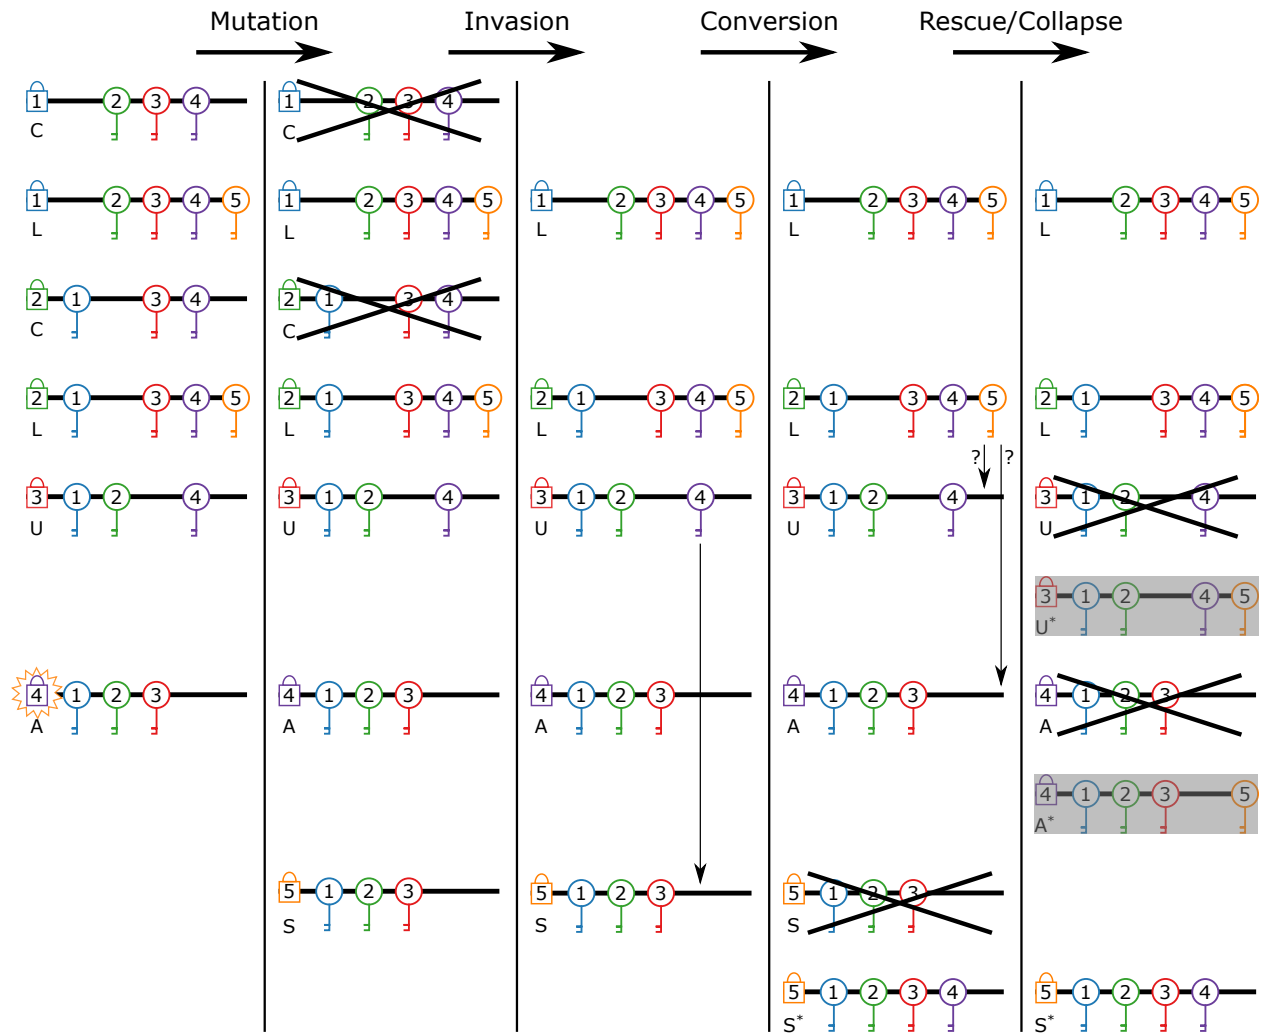

Figure 2: Model steps. These four steps describe a hypothetical pathway to expansion in the number of incompatibility haplotypes. In the “mutation” step, a lock allele mutates to a new specificity (from four to five in this case), one that can be unlocked by an existing, previously neutral key variant. In the “invasion” step, haplotypes with the key to the new lock spread and replace otherwise identical haplotypes lacking the key. In the “conversion” step, haplotypes acquire new keys. This step ends when either the lock mutant acquires the key to its ancestor’s lock, or when its ancestor acquires the key to the new lock. In the “rescue/collapse” step, the remaining haplotypes lacking the key to the new lock are driven to extinction unless they can acquire the missing key in their remaining time. Vertical arrows indicate gene conversion events. Each \* represents a haplotype that has acquired a missing key through gene conversion. Question marks indicate gene conversion events that may or may not produce a surviving gene convertant haplotype before the potential recipient is driven extinct. Gray boxes indicate haplotypes resulting from evolutionary rescue events that may or may not occur.

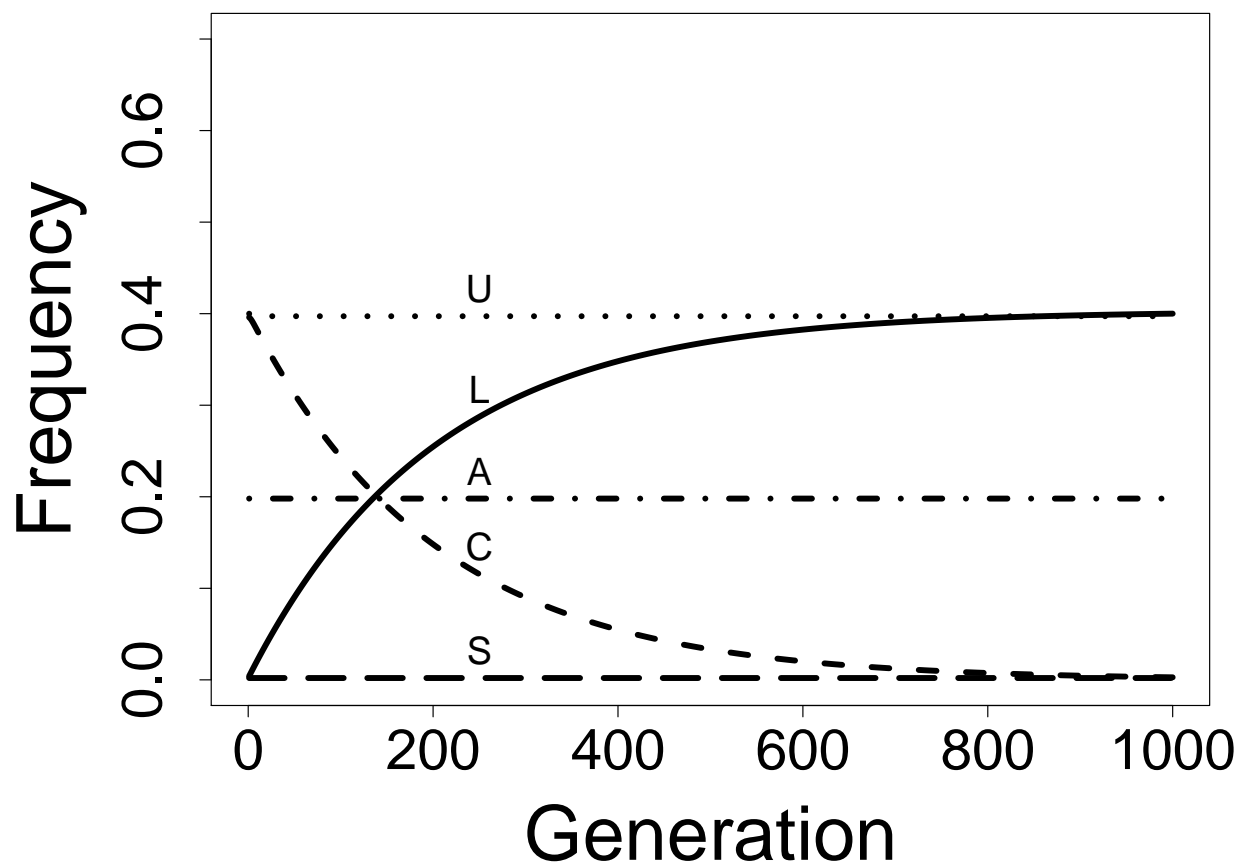

Figure 3: Invasion of a new key. When a new lock (S) arose, any haplotype that fortuitously possessed the key to it (L) invaded and replaced otherwise identical haplotypes lacking the key (C). The lock mutant's ancestor (A) was unaffected by the lock mutation because it could not fertilize the mutation's precursor (the ancestor's own lock) in the first place. The lock mutant (S) had identical siring success as its ancestor, so it was essentially a neutral variant and did not increase in frequency. All other haplotypes (U) decreased slightly in frequency because, with the origin of the new lock, the fraction of individuals they could fertilize decreased slightly. All trajectories were generated by numerical iteration with parameters  $d_L = d_S = 0.01$  and  $n_L = n_U = 2$ .

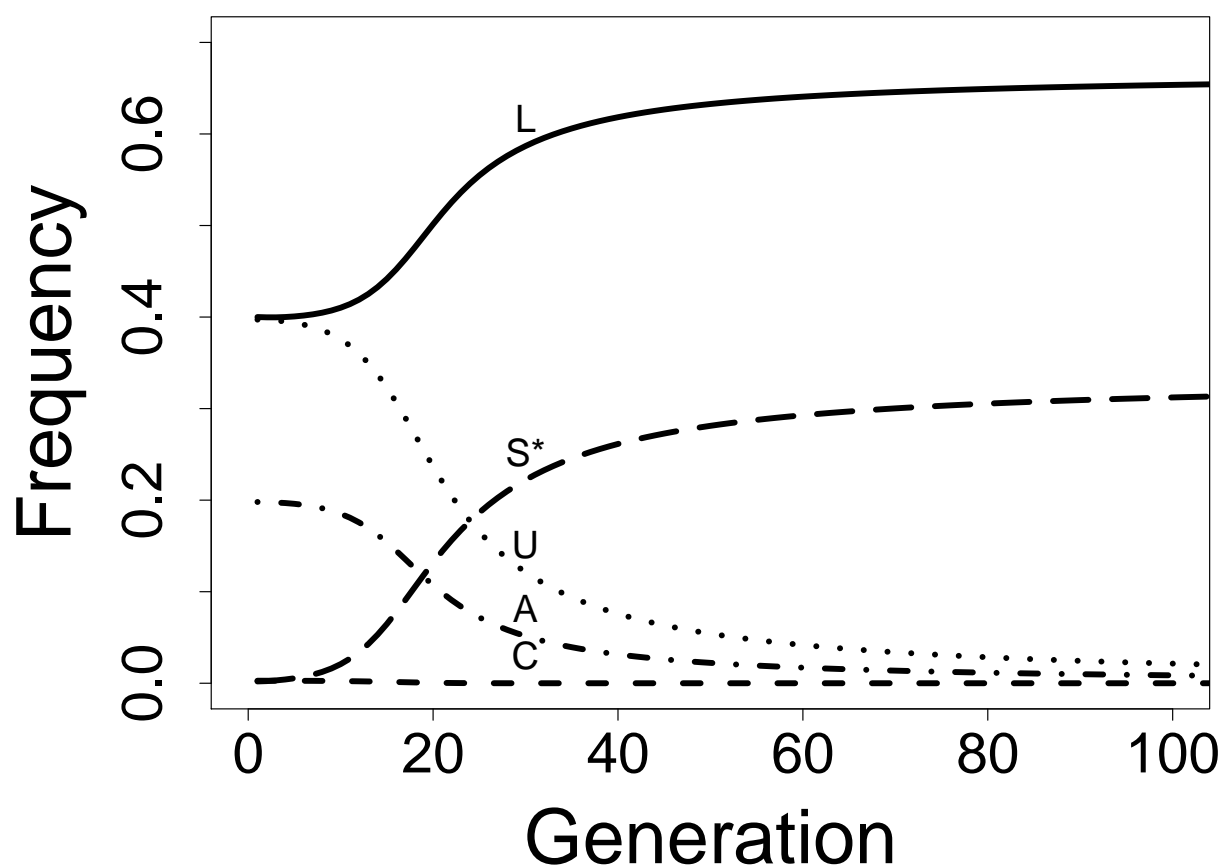

Figure 4: Doomed haplotypes. When the haplotype bearing the lock mutation acquires the key to its ancestor's lock (becoming  $S^*$ ), it invades. Those haplotypes possessing the key to the new lock (L) also benefit and reach high frequencies, while haplotypes lacking the key (C, U, A) are driven extinct. All trajectories were generated by numerical iteration with parameters  $d_L = d_S = 0.01$  and  $n_L = n_U = 2$ .

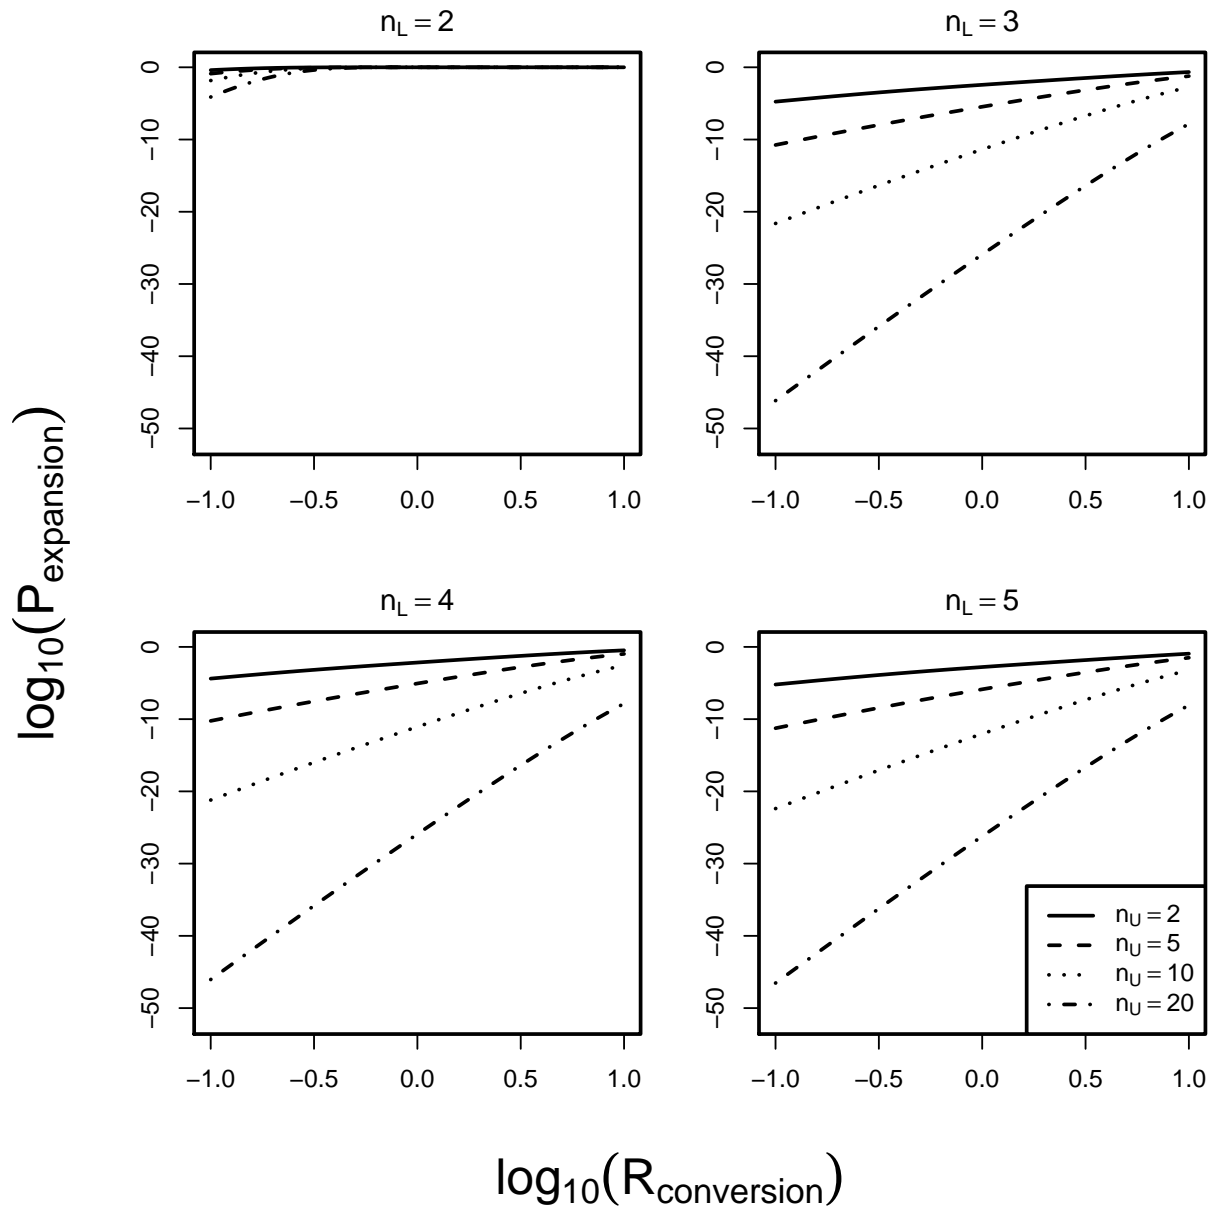

Figure 5: Expansion probability. Each curve represents the probability all doomed haplotypes are rescued for a given number of doomed haplotypes. The probability that all are rescued decreases as the number of doomed haplotypes ( $n_U$ ) increases, and it also usually decreases as the number of “lucky” haplotypes increases. Rescue is very unlikely unless either the population rate of gene conversion ( $R_{\text{conversion}}$ ) is very high or  $n_L$  is small.

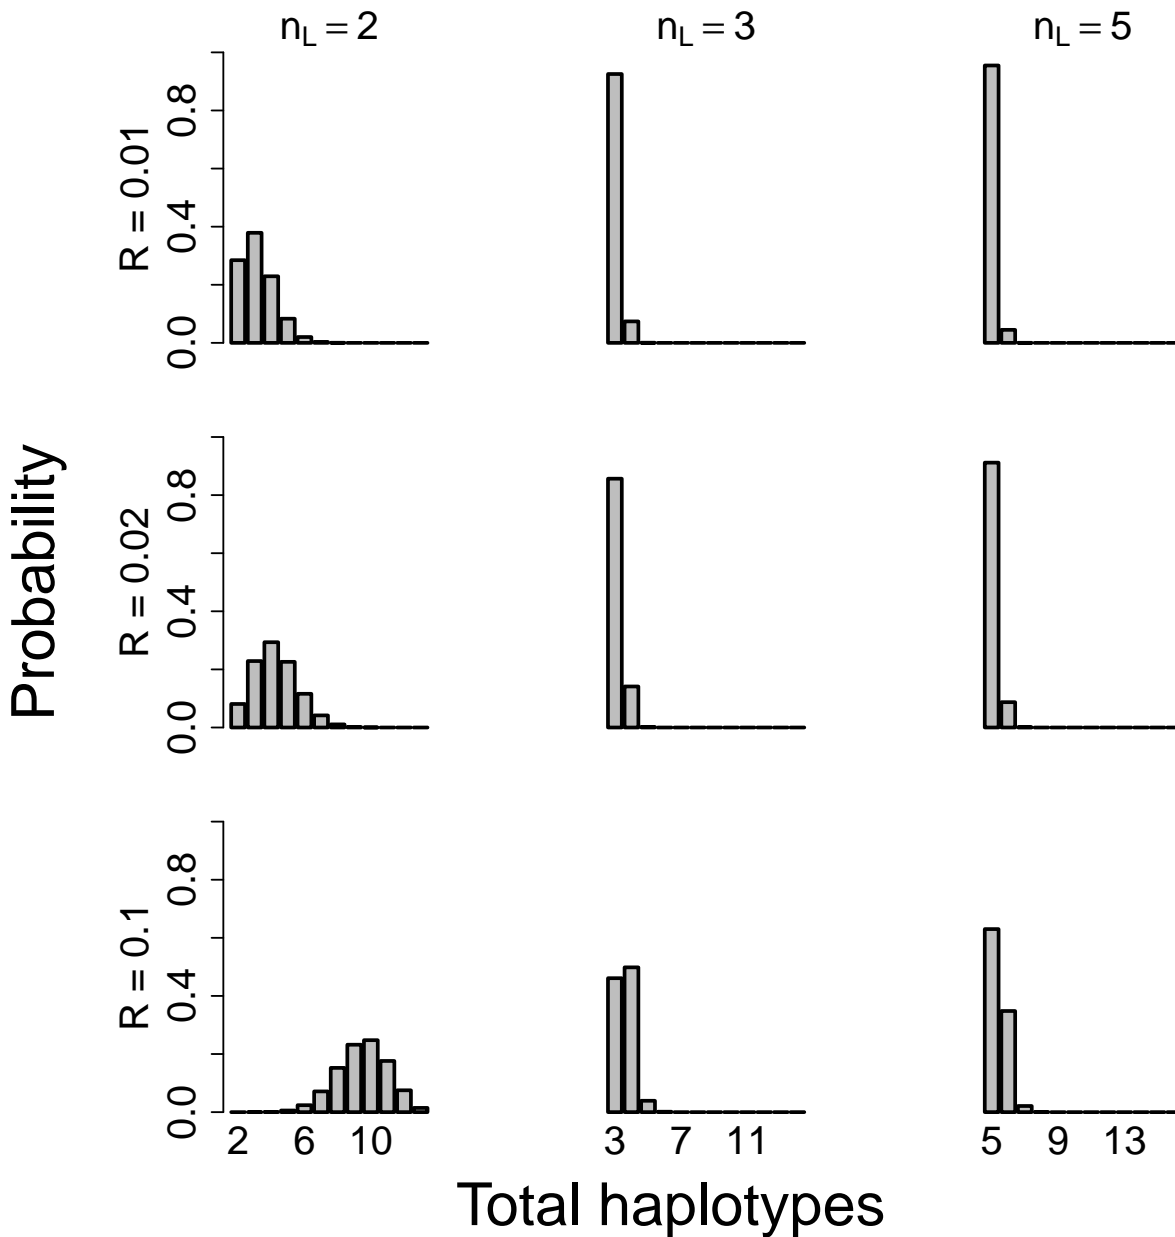

Figure 6: Distribution of final haplotype number. Expansion only occurs when the final number of haplotypes is  $n + 1$  (the rightmost bin in each histogram). For  $n_L > 2$  and small population gene conversion rates ( $R_{\text{conversion}}$ ), the most likely outcomes is either the loss of all doomed haplotypes or the loss of all but one. For all panels,  $n_U = 10$ .

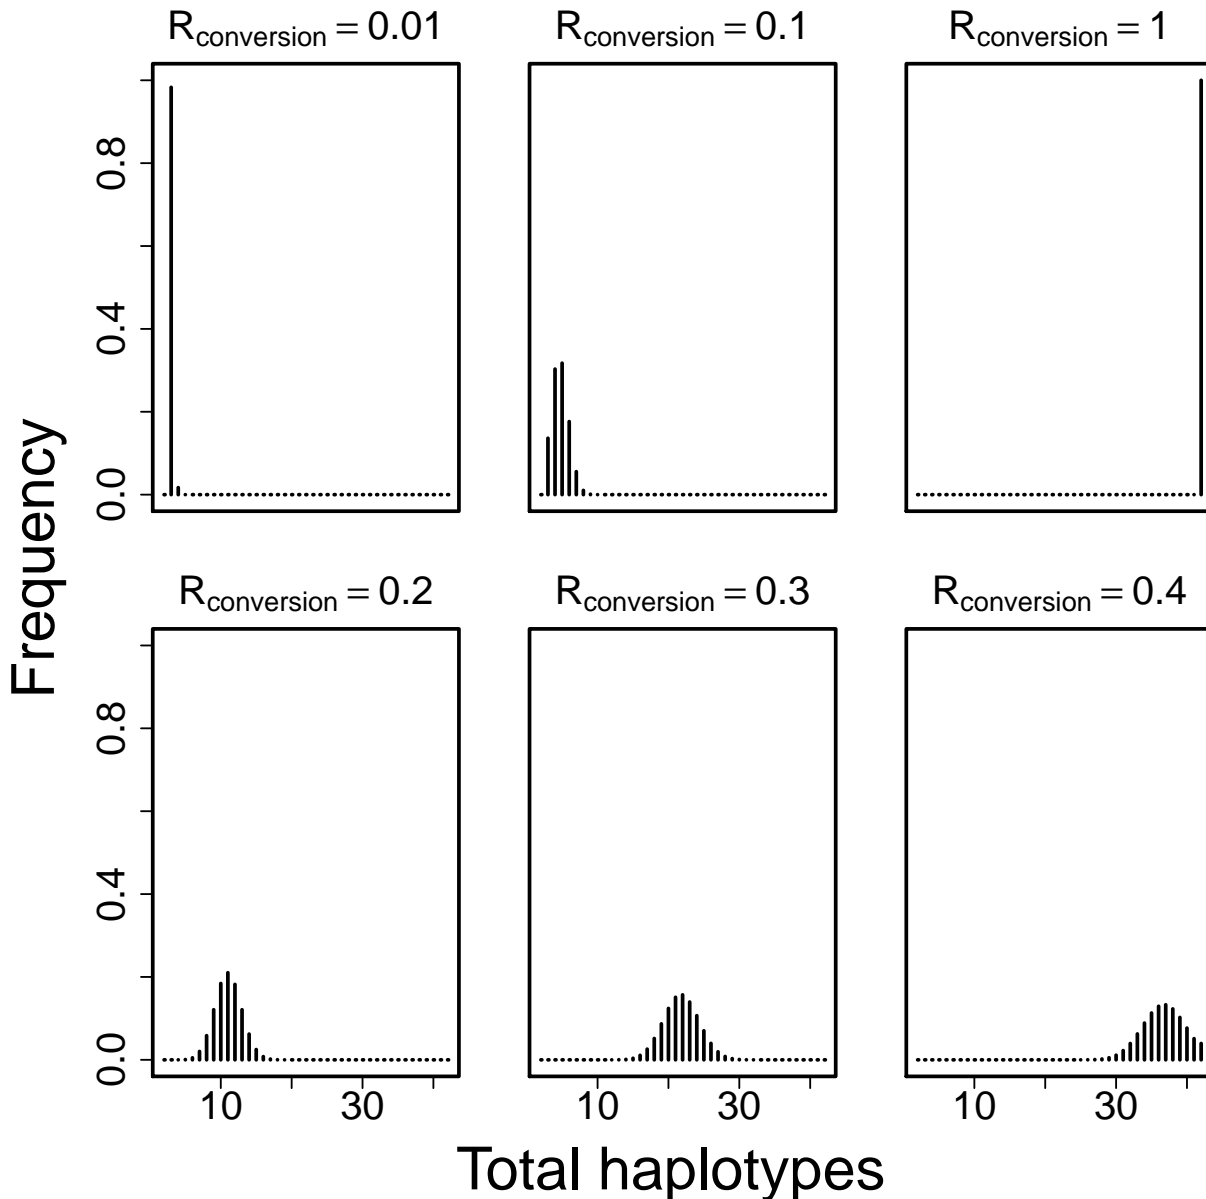

Figure 7: Stable distribution of haplotype number. The stable number of haplotypes increased as  $R_{\text{conversion}}$ , the supply of gene convertants, increased. The haplotype number came to exceed the biological minimum near  $R_{\text{conversion}} = 0.1$ , and produced 20–40 haplotypes around  $R_{\text{conversion}} = 0.3$  or  $0.4$ . For all panels, the Markov chain was run for 1000 steps (expansions or collapses), and  $n_L = 2$ . All probability of producing more than 40 incomplete haplotypes (i.e., 42 total haplotypes) is binned into the 42nd category.



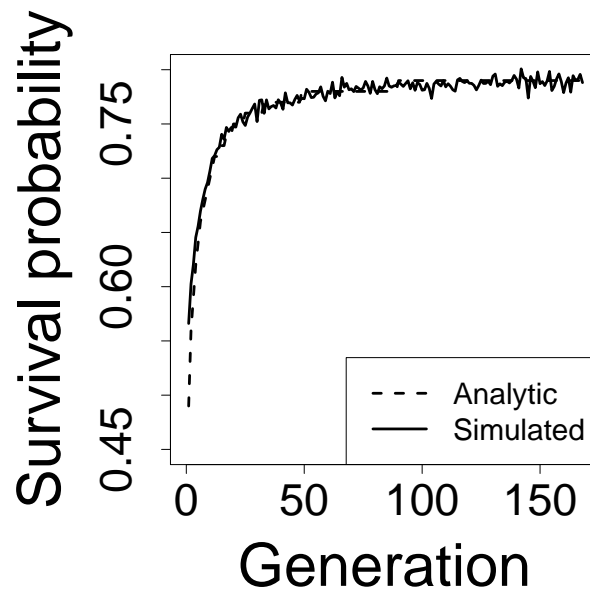

Figure S1: Survival probability of a new gene convertant. The history of a population with  $n_L = 2$ ,  $n_U = 2$ ,  $N = 10,000$  during the rescue phase was first determined by iterating the recursion equations. Survival probability was determined each generation using Haldane's series expansion (analytic) or by simulating survival of a new gene convertant for 10 generations over 10,000 replicate simulations (simulated).
